# Supplementary figures and images for: Targeting ADAM-17 with an inhibitory monoclonal antibody has antitumour effects in triple-negative breast cancer cells
Source: PubMed Central journal article supplement — Br J Cancer. 2015 May 26;112(12):1895–903. doi: 10.1038/bjc.2015.163 (PMC4580380; doi:10.1038/bjc.2015.163), 2015-05-26

# SUPPLEMENTARY FIGURE 1

**A**

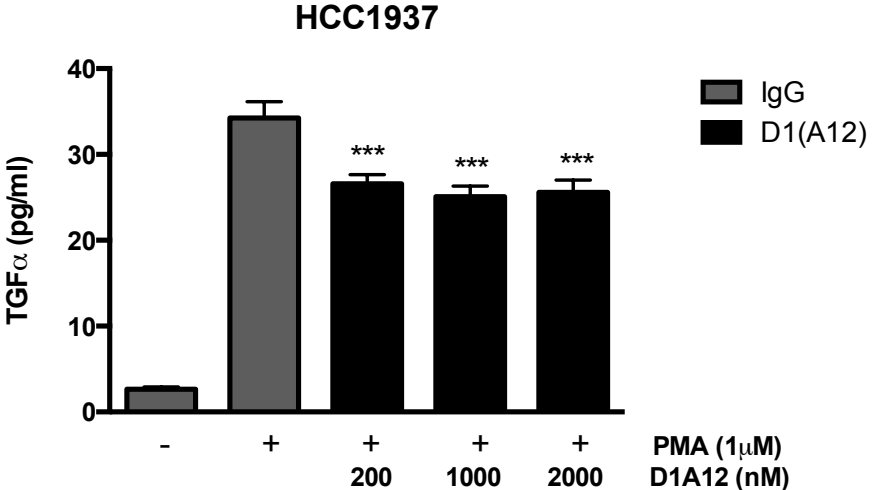

**B**

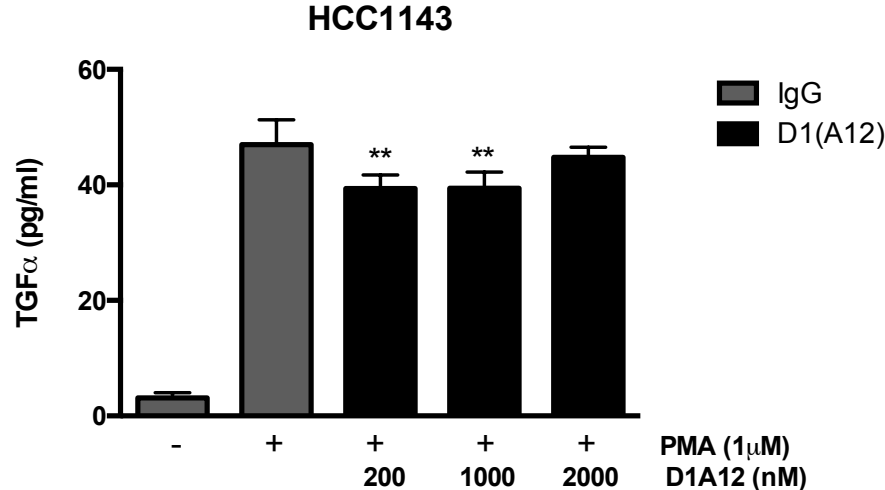

**C**

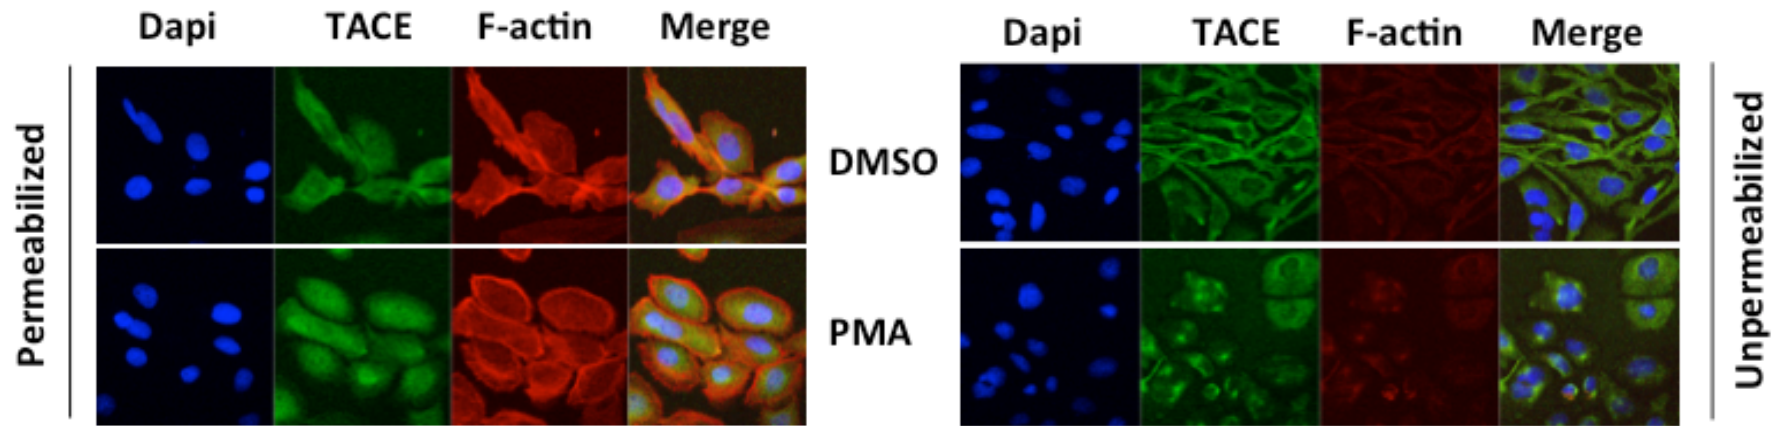

Supplement: bjc2015163x1.pdf [file bjc2015163x1.pdf]

# SUPPLEMENTARY FIGURE 2

**A**

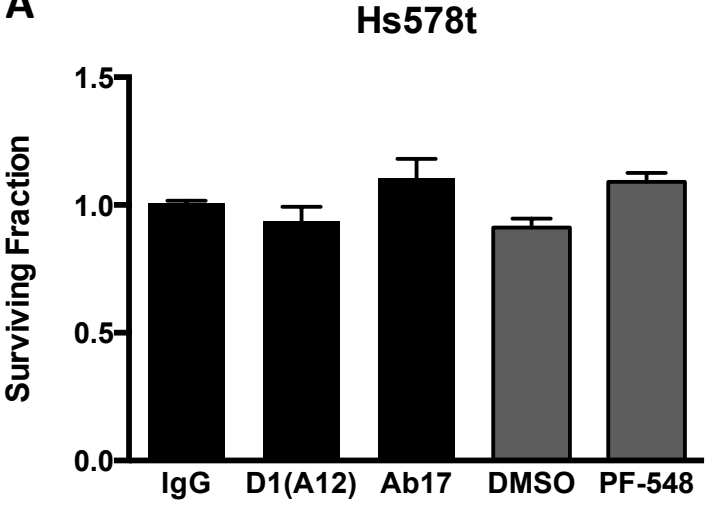

**B**

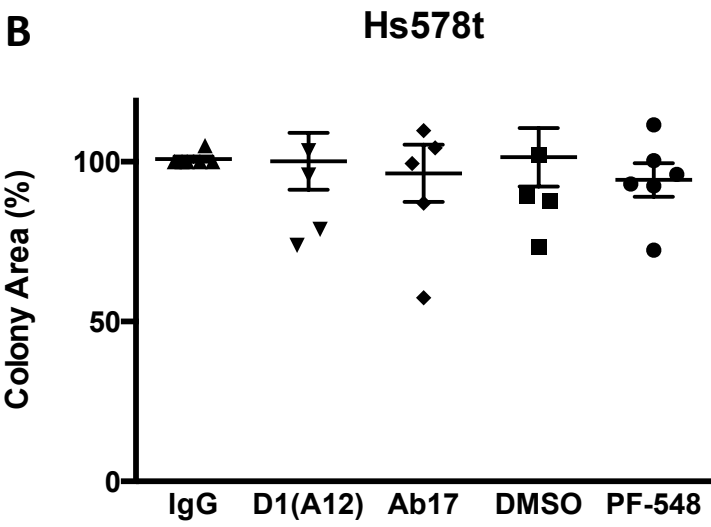

**C**

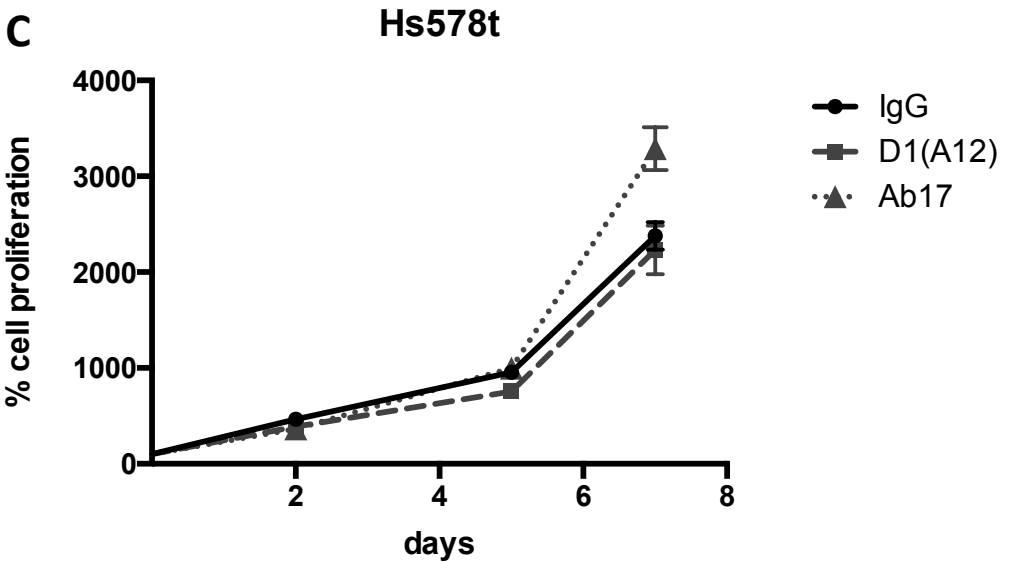

Supplement: bjc2015163x2.pdf [file bjc2015163x2.pdf]

# SUPPLEMENTARY FIGURE 3

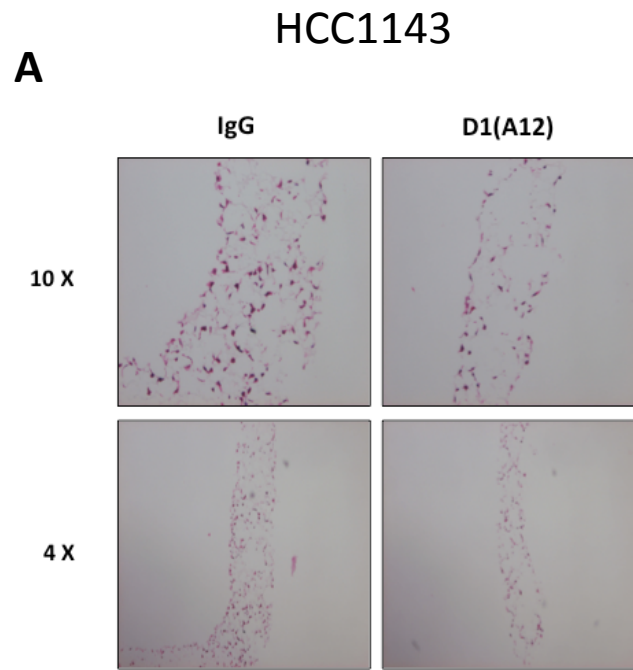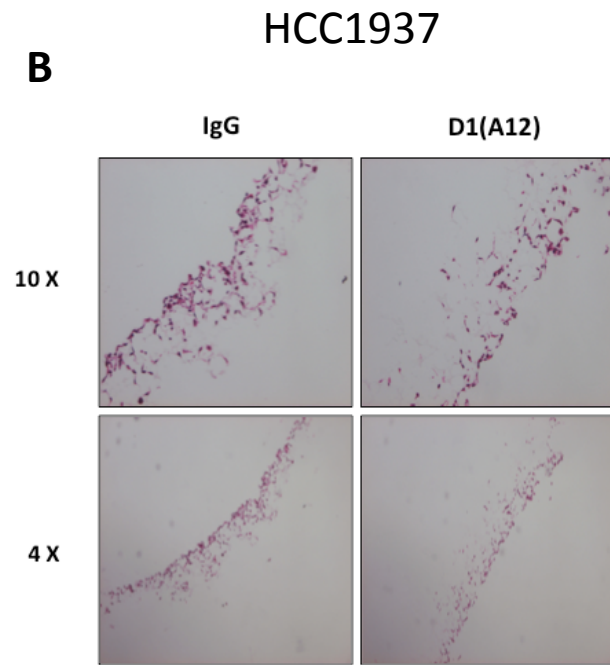

Supplement: bjc2015163x3.pdf [file bjc2015163x3.pdf]

# SUPPLEMENTARY FIGURE 4

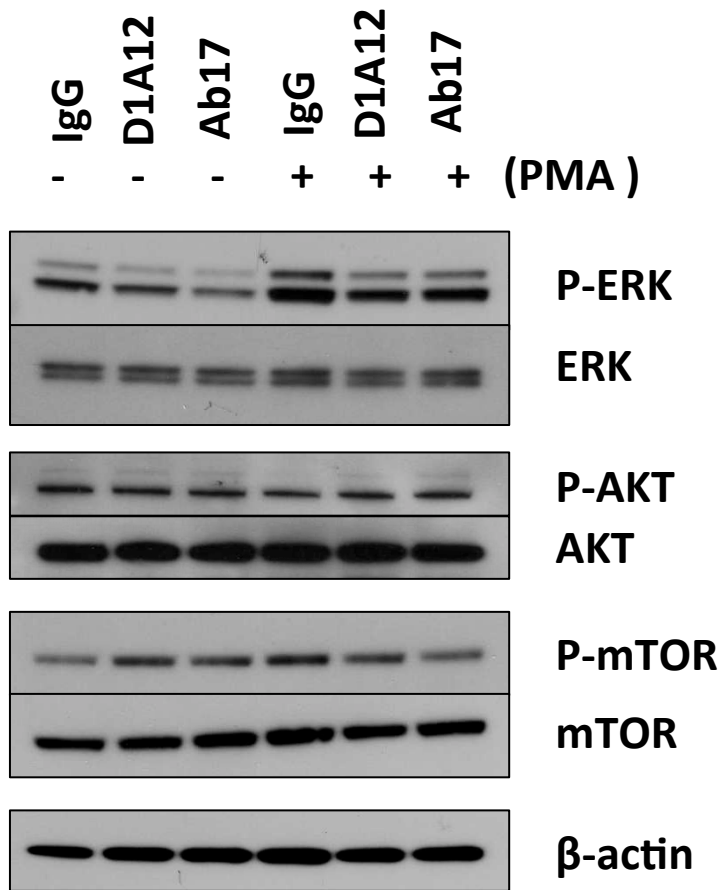

Supplement: bjc2015163x4.pdf [file bjc2015163x4.pdf]
